# Supplementary material for: Development and evaluation of a youth mental health community awareness campaign – The Compass Strategy
Source: PubMed Central journal article supplement (PMC1564138; doi:10.1186/1471-2458-6-215), 2006-08-22
Supplement: 1471-2458-6-215-S2.pdf [file 1471-2458-6-215-S2.pdf]

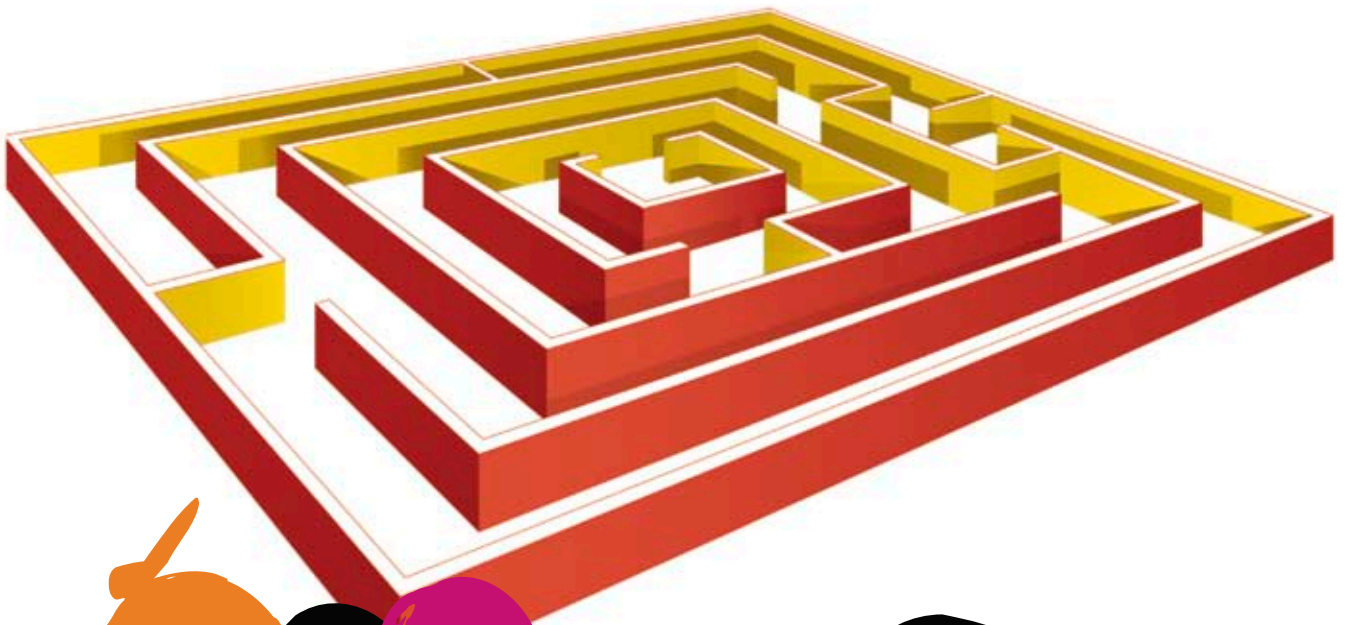

**C** **O** **N** **F** **U** **S** **E** **D**

**Or is it a sign of something else?**

**1 in 4 young people** will experience a mental health problem, such as **psychosis**.

Signs include:

- > Finding it more difficult than usual to cope with work or study
- > Difficulty relating to family and friends
- > Seeing and hearing things that others can't
- > Strange or unusual ideas that aren't based on reality

**Getting help early is a key to successful treatment.**

To find out how you can help someone get on top of psychosis, call **1300 73 22 11** or visit **www.getontop.org**

COM025D - © UNIVERSITY OF MELBOURNE 2002

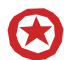

**the compass strategy**

get on top of it, before it gets on top of you
