# Supplementary material for: Development and evaluation of a youth mental health community awareness campaign – The Compass Strategy
Source: PubMed Central journal article supplement (PMC1564138; doi:10.1186/1471-2458-6-215), 2006-08-22
Supplement: 1471-2458-6-215-S3.pdf [file 1471-2458-6-215-S3.pdf]

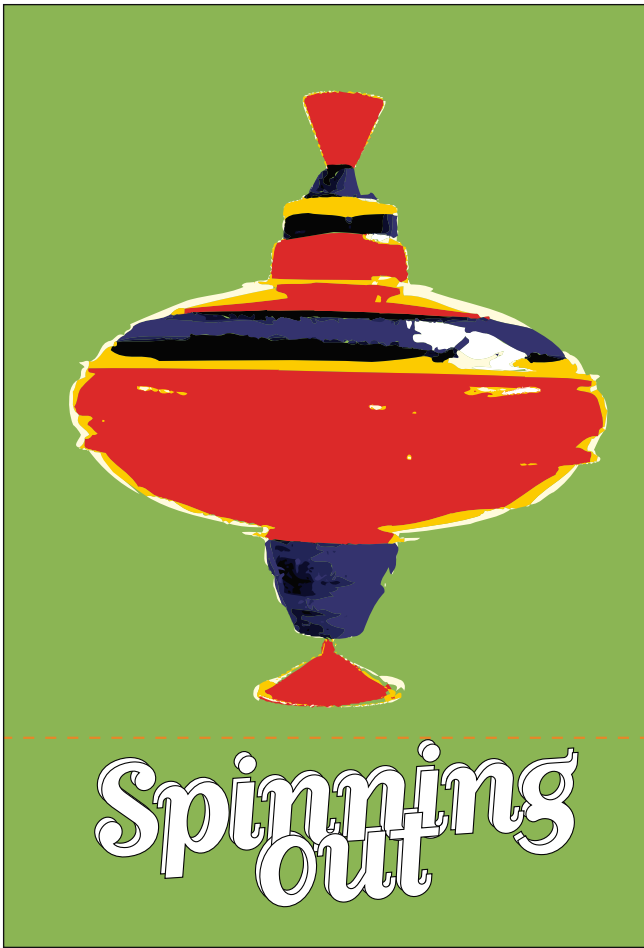



**the  
compass  
strategy**  
get on top of it, before  
it gets on top of you

Finding it more difficult than usual to cope with work or study can be an **early sign of psychosis**.

Other signs include:

- > Difficulty relating to family and friends
- > Seeing and hearing things that others can't
- > Strange or unusual ideas that aren't based on reality

**1 in 4 young people** will experience a mental health problem, such as psychosis. Getting help early is a key to successful treatment.

To get on top of depression and psychosis call  
**1300 73 22 11**  
 or visit [www.getontop.org](http://www.getontop.org)

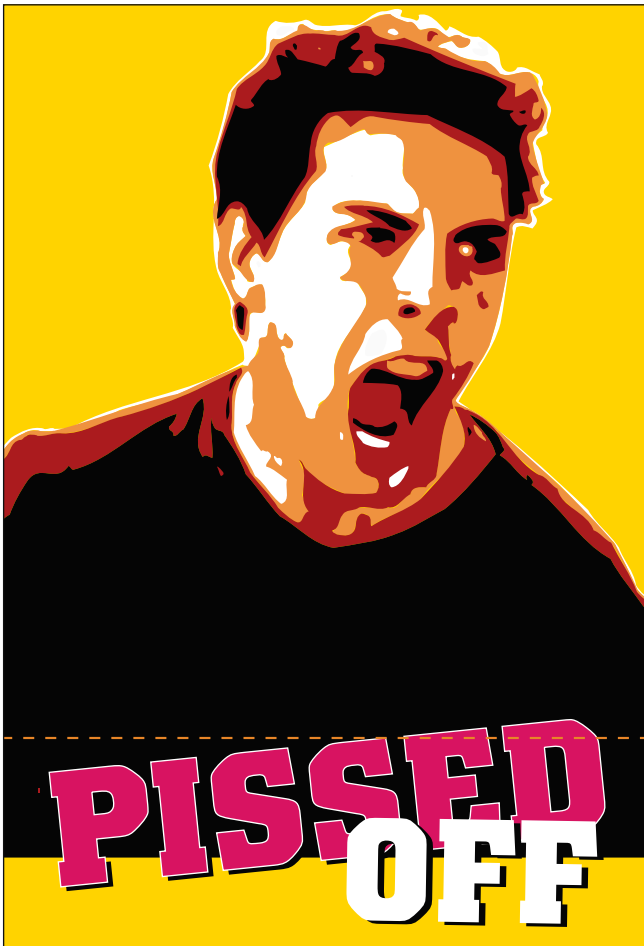



**the  
compass  
strategy**  
get on top of it, before  
it gets on top of you

Feeling irritable most of the time can be an **early sign of depression**.

Other signs include:

- > Feeling down most of the time
- > Loss of interest or pleasure in life
- > Difficulty coping with study or work

**1 in 4 young people** will experience a mental health problem, such as depression. Getting help early is a key to successful treatment.

To get on top of depression and psychosis call  
**1300 73 22 11**  
 or visit [www.getontop.org](http://www.getontop.org)

Example of Compass Postcards
