# Supplementary material for: Development and evaluation of a youth mental health community awareness campaign – The Compass Strategy
Source: PubMed Central journal article supplement (PMC1564138; doi:10.1186/1471-2458-6-215), 2006-08-22
Supplement: 1471-2458-6-215-S4.pdf [file 1471-2458-6-215-S4.pdf]

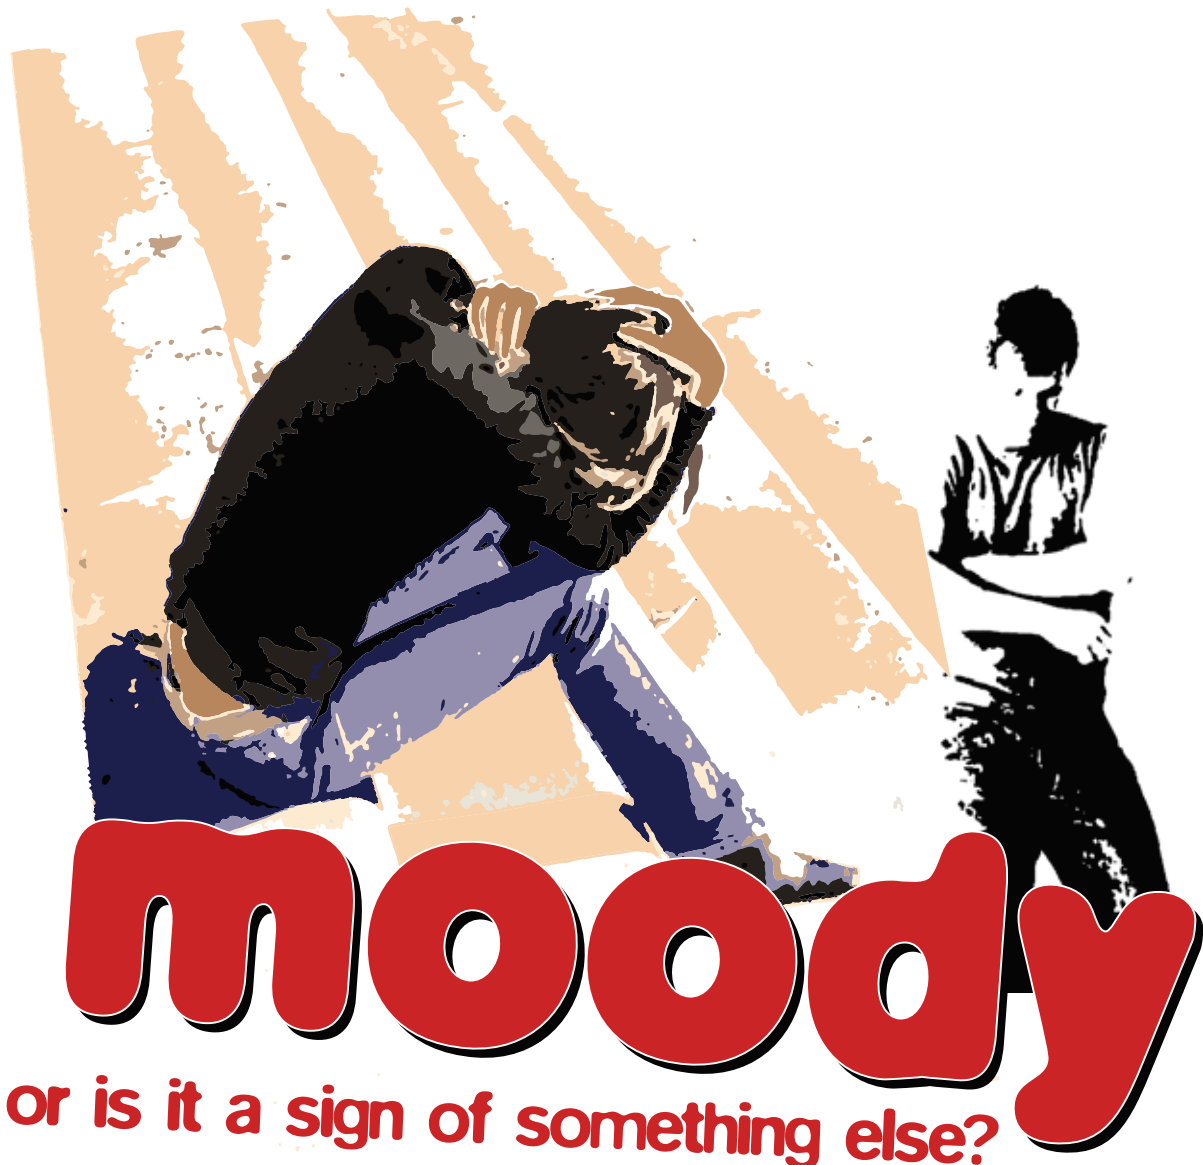

# moody

or is it a sign of something else?

Mental health problems affect up to 1 in 4 young people.

Getting help early is a key to successful treatment.

To find out how you can help someone get on top of depression or psychosis, **call 1300 73 22 11** or **visit [www.getontop.org](http://www.getontop.org)**.

> pick up our information brochure >

 **the compass strategy**  
get on top of it, before it gets on top of you

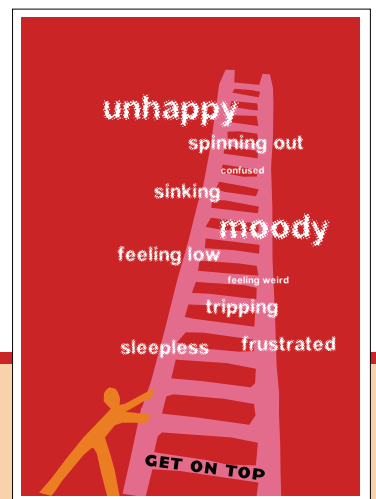

Example of Compass Poster
